# Supplementary material
Source: PubMed Central journal article supplement (PMC1413740)
Supplement: pnas_0510949103_1.pdf [file pnas_0510949103_1.pdf]

Table 3. In vivo properties of Swi3 SWIRM domain mutants

| SSW no. | Mutation            | Raf<br>°C | Gal<br>°C | Glyc<br>°C | Ino<br>°C | HU<br>°C | Protein<br>made | Assembled<br>into Swi/Snf |
|---------|---------------------|-----------|-----------|------------|-----------|----------|-----------------|---------------------------|
|         | WT                  | None      | None      | None       | None      | None     | Yes             | Yes                       |
|         | empty vector        | 23°C      | 23°C      | 23°C       | 23°C      | 23°C     | no              | no                        |
|         | SWIRM deletion      | 23°C      | 23°C      | 23°C       | 23°C      | 23°C     | Yes             | Yes                       |
| SSW2    | E329A, F330A, F331A | 23°C      | 23°C      | 23°C       | 23°C      | 23°C     | Yes             | Yes                       |
| SSW4    | D374A               | 23°C      | 33°C      | 35°C       | 30°C      | 23°C     | Yes             | Yes                       |
| SSW6    | E317A               | None      | None      | None       | None      | ND       | ND              | ND                        |
| SSW7    | E323A               | 23°C      | 23°C      | 23°C       | 23°C      | 23°C     | Yes             | Yes                       |
| SSW8    | Y346A               | None      | None      | None       | None      | ND       | ND              | ND                        |
| SSW9    | R347A               | 23°C      | 30°C      | 23°C       | 23°C      | 23°C     | Yes             | Yes                       |
| SSW10   | N348A               | 23°C      | None      | None       | None      | ND       | ND              | ND                        |
| SSW12   | L378A               | 33°C      | None      | None       | None      | ND       | ND              | ND                        |
| SSW13   | L381A               | 23°C      | None      | None       | None      | ND       | ND              | ND                        |
| SSW14   | L385A               | 23°C      | None      | None       | None      | ND       | ND              | ND                        |
| SSW15   | W388A               | 23°C      | None      | None       | None      | ND       | ND              | ND                        |
| SSW16   | L390A               | 23°C      | None      | None       | None      | ND       | ND              | ND                        |
| SSW18   | W313A               | 23°C      | None      | None       | 35°C      | ND       | Yes             | Yes                       |
| SSW19   | E329A               | 23°C      | 33°C      | 35°C       | 33°C      | ND       | Yes             | Yes                       |
| SSW20   | N357A               | None      | None      | None       | None      | ND       | Yes             | Yes                       |
| SSW21   | Y361A               | None      | None      | None       | None      | ND       | Yes             | Yes                       |
| SSW22   | S363A               | None      | None      | None       | None      | ND       | Yes             | Yes                       |
| SSW23   | N392A               | 23°C      | 33°C      | 33°C       | 33°C      | 30°C     | Yes             | Yes                       |
| SSW24   | Y393A               | None      | None      | None       | None      | ND       | Yes             | Yes                       |
| SSW25   | Y310A               | None      | None      | None       | None      | ND       | ND              | ND                        |
| SSW26   | N315A, K318D        | None      | None      | None       | None      | ND       | Yes             | Yes                       |
| SSW27   | N333A, R334E        | 23°C      | None      | None       | 35°C      | ND       | Yes             | Yes                       |
| SSW28   | S337A               | 23°C      | None      | None       | None      | ND       | Yes             | Yes                       |
| SSW29   | N359A, E360K        | 23°C      | None      | None       | None      | ND       | Yes             | Yes                       |
| SSW31   | K383D               | None      | None      | None       | None      | ND       | Yes             | Yes                       |
| SSW32   | K387D               | None      | None      | None       | None      | ND       | Yes             | Yes                       |
| SSW33   | W313A, W388A        | 23°C      | 33°C      | 33°C       | 33°C      | 30°C     | Yes             | Yes                       |
| SSW34   | K383D, K387D        | 23°C      | None      | None       | 35°C      | 30°C     | Yes             | Yes                       |

Media: Raf, YP+2% raffinose; Gal, YP+2% galactose; Glyc, YP+2% glycerol; Ino, SC lacking inositol; HU, YP+150mM hydroxyurea (YP, yeast peptone media; SC, synthetic complete media). For phenotypes, the temperature listed is the lowest temperature at which slow growth was detected. None; no detectable phenotype at any temperature; ND, not determined.
