# Supplementary material
Source: PubMed Central journal article supplement (PMC1413740)
Supplement: pnas_0510949103_2.pdf [file pnas_0510949103_2.pdf]

Table 4. In vivo properties of Rsc8 SWIRM domain mutants

| RSW no. | Mutation            | Ts     |
|---------|---------------------|--------|
| RSW1    | P83E                | 33°C   |
| RSW2    | D104A, F105A, F106A | Lethal |
| RSW3    | R122A, N123A        | Lethal |
| RSW4    | D148A, V149A        | Lethal |
| RSW5    | G164A, I166A, N167A | Lethal |
| RSW7    | E98A                | Lethal |
| RSW8    | T121A               | No     |
| RSW9    | R122A               | 33°C   |
| RSW10   | N123A               | No     |
| RSW11   | I126A               | 37°C   |
| RSW12   | I153A               | 37°C   |
| RSW13   | I156A               | 35°C   |
| RSW14   | L160A               | No     |
| RSW16   | L164A               | 35°C   |

Ts; the lowest temperature at which slow growth was observed;

No; indicates that slow growth was not seen at any temperature tested.
